# Supplementary material for: TiO2 nanoparticles alter iron homeostasis in Pseudomonas brassicacearum as revealed by PrrF sRNA modulation
Source: Royal Society of Chemistry journal article supplement (doi:10.1039/c6en00316h), 2016-01-01
Supplement: c6en00316h1.pdf [file c6en00316h1.pdf]

## Supplementary information

### **TiO<sub>2</sub> nanoparticles alter iron homeostasis in *Pseudomonas brassicacearum* as revealed by PrrF sRNA modulation**

Wei LIU<sup>a,b</sup>, Marie BERTRAND<sup>a,b</sup>, Corinne CHANEAC<sup>b,c</sup>, and Wafa ACHOUAK<sup>a,b</sup>

<sup>a</sup>Laboratory of Microbial Ecology of the Rhizosphere and Extreme Environments (LEMIRE), Aix-Marseille Université, CEA, CNRS, UMR 7265 Biosciences and biotechnology Institute of Aix-Marseille (BIAM), ECCOREV FR 3098, CEA/Cadarache, St-Paul-lez-Durance, France

<sup>b</sup>GDRi iCEINT, International Consortium for the Environmental Implication of Nanotechnology, CEREGE, F-13545 Aix-en-Provence, France

<sup>c</sup>Sorbonne Universités, UPMC Univ Paris 06, CNRS, Collège de France, Laboratoire de Chimie de la Matière Condensée de Paris, 75005 Paris, France.

**Figure S1**

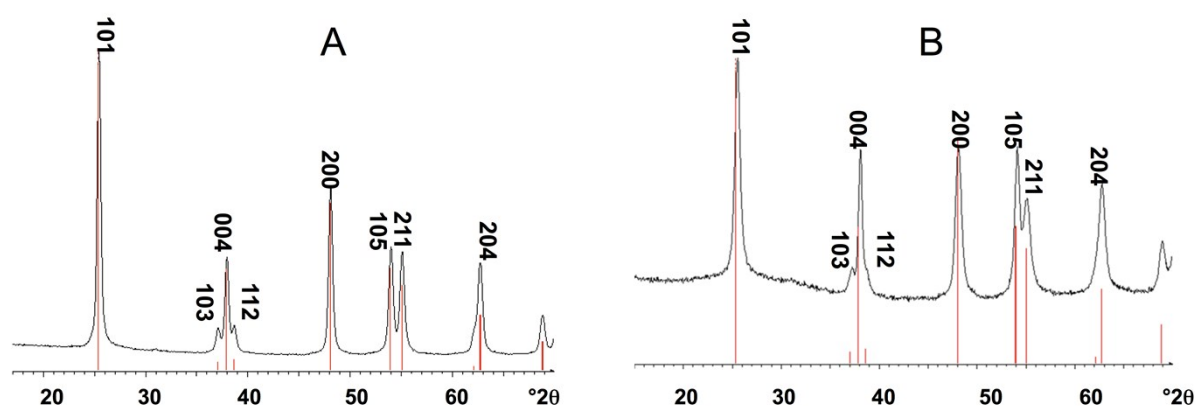

**Figure S1:** XRD patterns of anatase nanocubes (A) and nanorods (B). The differences between these patterns only concern the relative intensity of peaks due to the different morphologies. Peak intensity is in arbitrary unit.

**Figure S2**

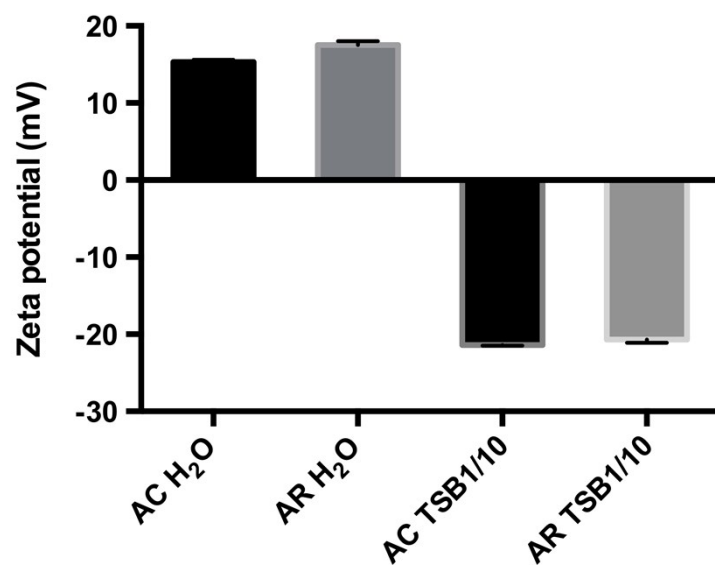

**Figure S2:** Zeta potential measurement of AC and AR NPs (10 mg/L) in Millipore water and in cell culture medium (TSB 1/10, pH:7.8)).

**Figure S3.**

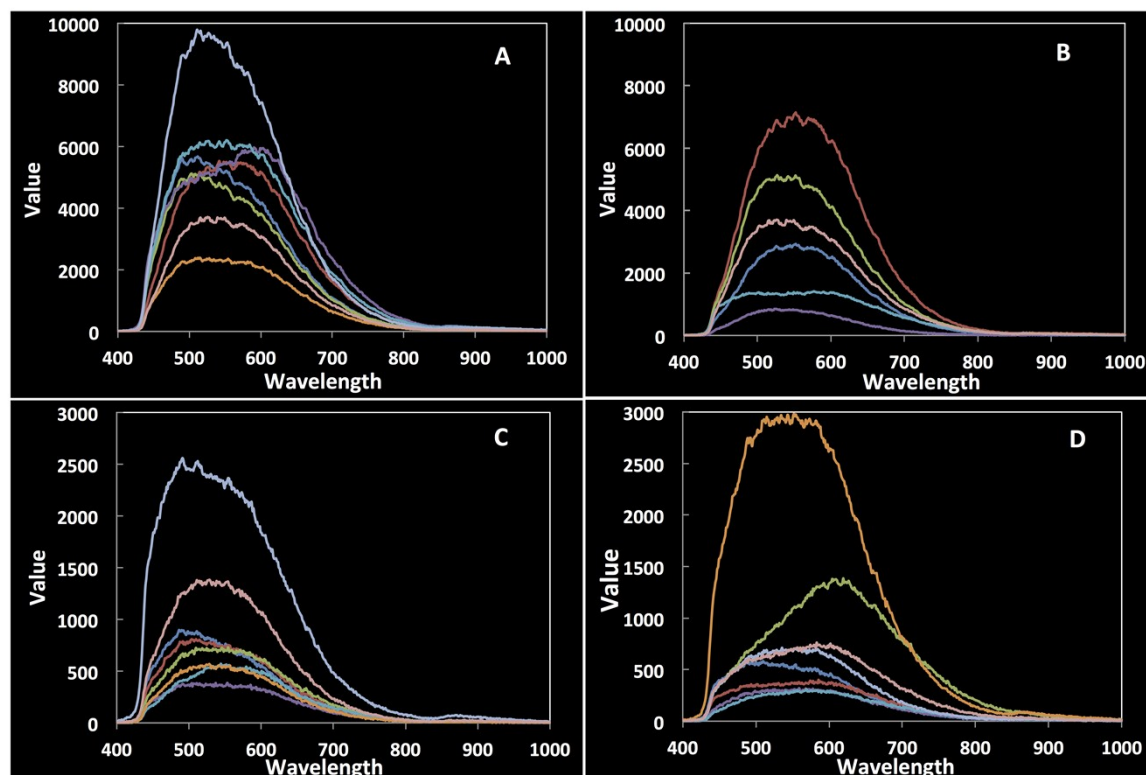

**Figure S3:** Spectral profiles of TiO<sub>2</sub>NPs. Eight spectral profiles of randomly selected for AC at 1 mg/l (A) and 10 mg/l (B); AR at 1 mg/l (C) and 10 mg/l (D) in the identical *in vitro* assay condition. Each colored line represents the spectrum from a single pixel.

**Figure S4**

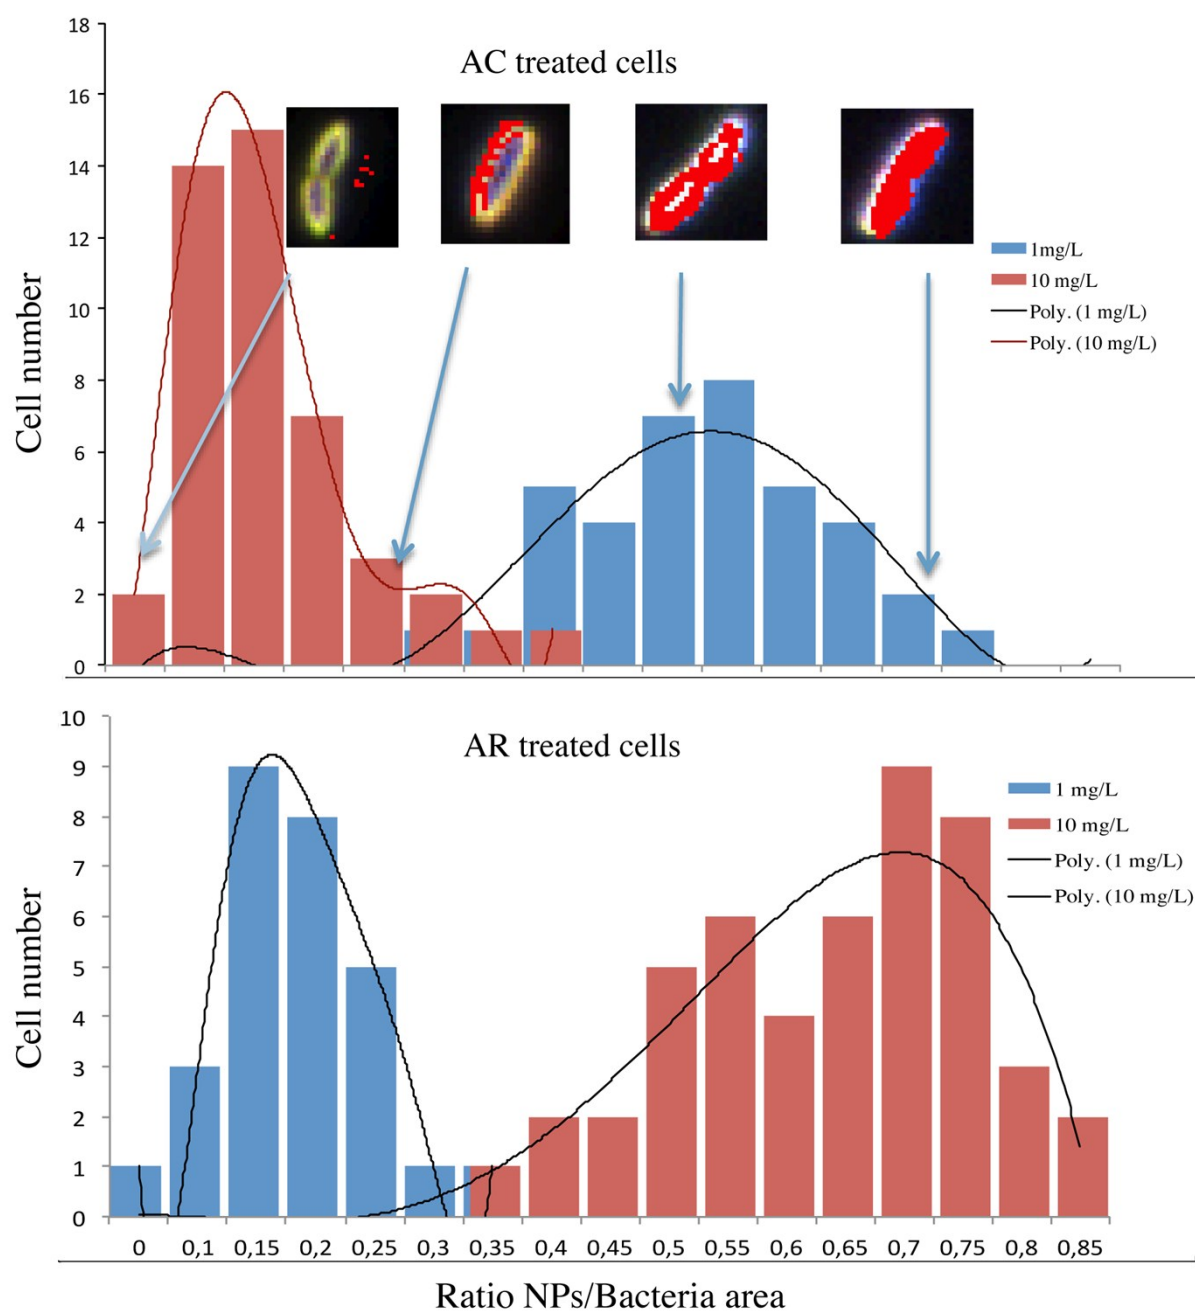

**Figure S4.** Statistics analysis of HSI images after SAM analyses as presented in Figure 4A. The value presented the means of 82 cells for AC exposure and 74 cells for AR NPs exposure at 1 mg/L and 10 mg/L. The results are presented as the ratio of NPs signatures area relative to the whole cell.
